# All-Cause Mortality in the Canterbury (New Zealand) Insulin-Treated Diabetic Registry Population

LAURIE J. BROWN, PHD  
 RUSSELL S. SCOTT, MD, PHD  
 CAMERON L. MOIR

**OBJECTIVE** — To establish all-cause death rates and life expectancies of and risk factors for mortality in insulin-treated diabetic individuals living in Canterbury, New Zealand.

**RESEARCH DESIGN AND METHODS** — Insulin-treated diabetic subjects ( $n = 1,008$ ) on the Canterbury Diabetes Registry were tracked over 9 years, and their vital status was determined. Death rates were standardized using direct and indirect methods. Cox proportional hazard regression was used to model the effects of demographic and clinical covariates on survival time.

**RESULTS** — At study entry, age ranged from 2.9 to 92.7 years, with mean  $48.7 \pm 20.4$  years; age at diagnosis was 0.2–88.9 years, mean  $34.5 \pm 20.0$  years; and duration of diabetes was 0.1–58.5 years, mean  $14.0 \pm 10.6$  years. There were 303 deaths in 7,372 person-years of follow-up with a standardized mortality ratio (SMR) of 2.6 (95% CI 2.4–3.0). Relative mortality was greatest for those aged 30–39 years (SMR 9.2 [4.8–16.2]). The death rate for the diabetic cohort standardized against the Segi world standard population was 16.2 per 1,000. Attained age, sex, and clinical subtype were significant predictors of mortality. The SMR for subjects with type 1 diabetes and age at onset  $<30$  years was 3.7 (CI 2.7–5.0), 2.2 (1.8–2.6) for those with onset  $\geq 30$  years, and 3.1 (2.5–3.7) for subjects suspected of having latent autoimmune diabetes in adulthood or insulin-treated type 2 diabetes. Life expectancy was reduced for both sexes at all ages.

**CONCLUSIONS** — Mortality rates for insulin-treated diabetic individuals remain high, resulting in shortened life spans relative to the general population. Marked differences in mortality exist between clinical groups of subjects. Further research is needed to improve diabetes classification and to clarify differences in health outcomes.

*Diabetes Care* 24:56–63, 2001

Despite improvements in the prognosis of individuals with diabetes (1–6), mortality is still two to four times higher for this population compared with general populations (7–9), with life expectancy reduced by up to one-third (5,10). This research is a prospective cohort study examining mortality in the Canterbury Diabetes Registry insulin-treated population (11,12). Canterbury is a well-defined geo-

graphic and health services region of New Zealand. In 1991, Canterbury had a population of 357,183, 85% of which lived in Christchurch, the province's main urban center. Information on diabetes-related mortality in the Asia-Pacific region is very limited, particularly for type 1 diabetes. In a Western Australian study (13), determination of death rates for type 1 diabetic individuals was not feasible because of the small

number of events in this subject group. Diabetes was found to be a significant predictor of all-cause mortality and coronary heart disease in an elderly Australian community, but again, this study focused on type 2 diabetes (14). In New Zealand, Scragg (15) reported secular trends in mortality (1966–1985), but no distinction was made for type of diabetes, and cases were enumerated through death certificates, which is problematic (16). The Tasmanian (Australian) Diabetes Registry mortality study (9) is the only other research undertaken in the region that is directly comparable to that reported here.

The aims of this study were as follows: 1) to establish all-cause age-sex-specific death rates and life expectancies of insulin-treated diabetic individuals; 2) to compare these with those of the general Canterbury population; 3) to examine the importance of demographic and clinical risk factors as predictors of mortality (1,2,17); and 4) given the current debate over the heterogeneity of type 1 autoimmune diabetes (18–21), to determine whether differences in mortality exist between different clinical subgroups of insulin users.

## RESEARCH DESIGN AND METHODS

### Study population

Subjects were included on the Canterbury Diabetes Registry's 1984 prevalence database if they were using long-term insulin and Canterbury was their usual place of residence, i.e., they lived most of the year there and were not visiting the region. Procedures for case identification, data acquisition, and case ascertainment of the Registry have been described previously (11,12). Completeness of the registry was estimated to exceed 95%, with the primary case ascertainment method being community-based pharmacy surveys. Secondary identification included review of hospital admissions, attendance at specialist diabetes services, and contact with local general practitioners.

Reflecting recent attempts at reclassification of diabetes (9,18,19), the study cohort was separated into three groups. In

From the School of Geosciences (L.J.B.), University of Wollongong, Wollongong, New South Wales, Australia; and the Lipid and Diabetes Research Group (R.S.S., C.L.M.), Christchurch Hospital, Christchurch, New Zealand.

Address correspondence and reprint requests to Dr. L.J. Brown, School of Geosciences, University of Wollongong, Wollongong, NSW 2522, Australia. E-mail: laurie\_brown@uow.edu.au.

Received for publication 28 April 2000 and accepted in revised form 19 September 2000.

**Abbreviations:** SMR, standardized mortality ratio.

A table elsewhere in this issue shows conventional and Système International (SI) units and conversion factors for many substances.

Table 1—Demographic characteristics of study subjects at entry to follow-up (1 January 1984)

| Age-group<br>(years) | Age       |            |            | Age at diagnosis |                     |           |                     |            |                     |
|----------------------|-----------|------------|------------|------------------|---------------------|-----------|---------------------|------------|---------------------|
|                      |           |            |            | Male             |                     | Female    |                     | Total      |                     |
|                      | Male      | Female     | Total      | n (%)            | Insulin<br>at onset | n (%)     | Insulin<br>at onset | n (%)      | Insulin<br>at onset |
| 0–9                  | 7 (1.4)   | 6 (1.2)    | 13 (1.3)   | 55 (11.0)        | 55                  | 63 (12.5) | 63                  | 118 (11.8) | 118                 |
| 10–19                | 51 (10.2) | 47 (9.3)   | 98 (9.7)   | 102 (20.4)       | 102                 | 84 (16.7) | 82                  | 186 (18.5) | 184                 |
| 20–29                | 67 (13.4) | 54 (10.6)  | 121 (12.0) | 77 (15.4)        | 72                  | 63 (12.5) | 57                  | 140 (13.9) | 129                 |
| 30–39                | 52 (10.4) | 61 (12.0)  | 113 (11.2) | 68 (13.6)        | 52                  | 78 (15.5) | 59                  | 146 (14.5) | 111                 |
| 40–49                | 74 (14.8) | 52 (10.3)  | 126 (12.5) | 85 (17.0)        | 61                  | 73 (14.5) | 35                  | 158 (15.7) | 96                  |
| 50–59                | 96 (19.2) | 83 (16.3)  | 179 (17.8) | 67 (13.4)        | 41                  | 76 (15.1) | 48                  | 143 (14.2) | 89                  |
| 60–69                | 90 (18.0) | 113 (22.3) | 203 (20.1) | 31 (6.2)         | 24                  | 43 (8.5)  | 28                  | 74 (7.4)   | 52                  |
| 70–79                | 48 (9.6)  | 65 (12.8)  | 113 (11.2) | 12 (2.4)         | 8                   | 21 (4.2)  | 12                  | 33 (3.3)   | 20                  |
| ≥80                  | 15 (3.0)  | 27 (5.3)   | 42 (4.2)   | 2 (0.4)          | 2                   | 3 (0.6)   | 2                   | 5 (0.5)    | 4                   |
| Total                | 500       | 508        | 1,008      | 499              | 417                 | 504       | 386                 | 1,003*     | 803                 |

Data are n (%) or n. Insulin at onset indicates the number of subjects commencing insulin within 12 months of diagnosis. \*Data are missing for five subjects.

the absence of adequate biomarker data on a sufficient number of subjects, categorization was based on age at onset of diabetes and commencement of insulin therapy. This approach was also used by Riley et al. (9). Group A comprised all subjects who had been diagnosed at age <30 years and who commenced insulin therapy within 12 months of diagnosis. It is assumed that this group has type 1 diabetes. Group B comprised patients defined by age at onset of diabetes of ≥30 years and commencement of insulin treatment within 12 months of diagnosis, indicating adult-onset type 1 diabetes. Group C subjects are those for whom insulin therapy commenced >12 months after diagnosis. While age at onset is not part of this categorization, virtually all of these subjects had maturity-onset diabetes. These subjects are assumed to have latent autoimmune diabetes or insulin-treated type 2 diabetes (22,23).

At commencement of follow-up on 1 January 1984, there were 1,008 subjects (500 male, 508 female). Age at entry to the study ranged from 2.9 to 92.7 years; 11% were <20 years and 15.4% were ≥70 years of age (Table 1). Female subjects were on average older than male subjects (mean ± SD 50.2 ± 20.7 vs. 47.3 ± 20.0,  $P = 0.028$ ). Mean age at onset of diabetes was 34.5 ± 20.0 years (range 2.5 months to 88.9 years), and duration of diabetes was 14.0 ± 10.6 years (newly diagnosed to 58.5 years). Of the total cohort, 42.9% had been diagnosed with diabetes <10 years at time of entry to the study. Few subjects had diabetes of >30 years' duration (8.8%), with only four individuals having had diabetes for >50 years. Only 25 subjects were of

non-European background (16 Maori, 2 Pacific Islanders, and 7 Chinese), a number reflecting the lower incidence of type 1 diabetes in these ethnic groups (24). Of these, 16 subjects were classified as group B, 7 as group A, and only 2 as group C.

Data necessary to classify subjects into groups A, B, or C were missing for five individuals. Of the remaining 1,003 subjects, 431 were classified as group A, 372 as group B, and 200 as group C. Group A had relatively more male subjects (53.1% male), group B was sex-balanced (50.5% male), and group C had more female subjects (59.0% female) ( $P = 0.017$ ). The mean age of subjects in group A at baseline was 31.9 ± 17.0; group B, 60.8 ± 12.6; and group C, 64.4 ± 10.9 years ( $P < 0.001$ ). Mean age at diagnosis for group A was 16.4 ± 13.0; group B, 49.0 ± 12.6; and group C, 49.3 ± 12.5 years. Mean duration of diabetes for group A subjects at 15.5 ± 12.3 years was similar to that for those in group C (15.1 ± 7.6 years), but significantly greater than that for subjects in group B (11.8 ± 9.4 years;  $P < 0.001$ ). Overall, male subjects were more likely than female subjects to start insulin at or within 12 months of diagnosis ( $P = 0.006$ ), as were those in the younger than older decades ( $P < 0.001$ ) (Table 1).

### Follow-up

The study cohort was tracked over 9 years, with vital status determined as of 1 January 1993. Review of patient attendance on specialist diabetes and hospital services was the most productive and efficient tracking method because 1) every individual using New Zealand's nationwide public hospital

system is identified by a unique patient identification code under which all attendances and admissions are recorded irrespective of place of hospitalization, 2) public hospital inpatient and specialist diabetes outpatient clinical and educational services are provided through one centralized health service in Canterbury, and 3) >70% of Canterbury's insulin-treated diabetic population attend this service for annual review each year. The status of ~85% of subjects was determined using this method. The remaining patients were then tracked via search of electoral rolls, telephone books, and government death registries and through contacting the lay Diabetes Society, local community-based doctors, and patients' families. Overall, 4.1% of the total cohort were lost to follow-up through known emigration overseas or because they could not be traced over the entire study period. The mean age at study entry of the 19 migrants was 29.9 ± 19.4 years and that of the 22 untraced subjects was 34.3 ± 12.4 years.

### Mortality data

Death certificate records registered at local branches and at the national office of the New Zealand Department of Justice Registrar of Births, Deaths and Marriages were reviewed for subjects identified as having died during the follow-up period. Demographic information was checked, and data on date, place, and cause(s) of death were obtained. Death notifications in local newspapers provided additional case identification and verification. Vital statistics and census data to derive age-sex-specific death rates for Canterbury's general

Table 2—Mortality in Canterbury's insulin-treated diabetic population compared with the general population (1 January 1984–1 January 1993)

| Age-group (years) | Follow-up (person-years) | Observed number of deaths | Death rate (per 1,000 person-years) (95% CI) | Death rate in the Canterbury population (per 1,000 person-years) | Expected number of deaths | SMR (95% CI)       |
|-------------------|--------------------------|---------------------------|----------------------------------------------|------------------------------------------------------------------|---------------------------|--------------------|
| 0–29              |                          |                           |                                              |                                                                  |                           |                    |
| Female            | 674.5                    | 2                         | 3.0 (0.4–10.8)                               | 0.67                                                             | 0.5                       | 4.43 (0.48–14.44)  |
| Male              | 800.5                    | 2                         | 2.5 (0.3–9.0)                                | 1.24                                                             | 1.0                       | 2.01 (0.24–7.22)   |
| Total             | 1,475.0                  | 4                         | 2.7 (0.7–6.9)                                | 0.98                                                             | 1.5                       | 2.67 (0.73–6.84)   |
| 30–39             |                          |                           |                                              |                                                                  |                           |                    |
| Female            | 557.4                    | 5                         | 9.0 (2.9–20.9)                               | 0.96                                                             | 0.5                       | 10.00 (3.24–23.30) |
| Male              | 462.0                    | 7                         | 15.2 (6.1–31.2)                              | 1.66                                                             | 0.8                       | 8.75 (3.51–18.03)  |
| Total             | 1,019.4                  | 12                        | 11.7 (6.1–20.5)                              | 1.31                                                             | 1.3                       | 9.23 (4.77–16.15)  |
| 40–49             |                          |                           |                                              |                                                                  |                           |                    |
| Female            | 478.0                    | 4                         | 8.4 (2.3–21.4)                               | 1.76                                                             | 0.8                       | 5.00 (1.36–12.80)  |
| Male              | 533.7                    | 8                         | 15.0 (6.5–29.5)                              | 2.73                                                             | 1.5                       | 5.33 (2.30–10.50)  |
| Total             | 1,011.7                  | 12                        | 11.9 (6.1–20.8)                              | 2.24                                                             | 2.3                       | 5.22 (2.70–9.14)   |
| 50–59             |                          |                           |                                              |                                                                  |                           |                    |
| Female            | 487.4                    | 13                        | 26.7 (14.2–45.6)                             | 4.73                                                             | 2.3                       | 5.65 (3.01–9.66)   |
| Male              | 644.4                    | 20                        | 31.0 (19.0–47.8)                             | 8.45                                                             | 5.4                       | 3.70 (2.26–5.70)   |
| Total             | 1,131.8                  | 33                        | 29.2 (20.1–41.0)                             | 6.59                                                             | 7.7                       | 4.29 (2.95–6.03)   |
| 60–69             |                          |                           |                                              |                                                                  |                           |                    |
| Female            | 818.1                    | 37                        | 45.2 (31.8–62.4)                             | 12.31                                                            | 10.1                      | 3.66 (2.58–5.04)   |
| Male              | 621.2                    | 39                        | 62.8 (44.6–85.7)                             | 22.48                                                            | 14.0                      | 2.79 (1.98–3.81)   |
| Total             | 1,439.2                  | 76                        | 52.8 (41.1–67.5)                             | 16.86                                                            | 24.0                      | 3.17 (2.51–3.99)   |
| 70–79             |                          |                           |                                              |                                                                  |                           |                    |
| Female            | 598.7                    | 45                        | 75.2 (54.8–100.7)                            | 33.96                                                            | 20.3                      | 2.22 (1.62–2.97)   |
| Male              | 439.5                    | 53                        | 120.6 (90.4–158.5)                           | 57.83                                                            | 25.4                      | 2.09 (1.57–2.75)   |
| Total             | 1,038.2                  | 98                        | 94.4 (71.1–115.5)                            | 43.78                                                            | 45.8                      | 2.14 (1.75–2.62)   |
| ≥80               |                          |                           |                                              |                                                                  |                           |                    |
| Female            | 165.9                    | 41                        | 247.1 (177.2–335.1)                          | 113.33                                                           | 18.8                      | 2.18 (1.56–2.96)   |
| Male              | 90.7                     | 27                        | 297.7 (196.2–434.6)                          | 145.39                                                           | 13.2                      | 2.05 (1.35–2.99)   |
| Total             | 256.6                    | 68                        | 265.0 (207.2–338.1)                          | 123.15                                                           | 32.0                      | 2.13 (1.67–2.72)   |
| Total             |                          |                           |                                              |                                                                  |                           |                    |
| Female            | 3,780                    | 147                       | 38.9 (33.0–45.9)                             | 8.09                                                             | 53.2                      | 2.76 (2.34–3.26)   |
| Male              | 3,592                    | 156                       | 43.4 (37.0–51.0)                             | 8.88                                                             | 61.4                      | 2.54 (2.16–2.98)   |
| Total             | 7,372                    | 303                       | 41.1 (36.7–46.1)                             | 8.48                                                             | 114.6                     | 2.64 (2.36–2.96)   |

population were purchased from Statistics New Zealand for the census years 1986 and 1991.

### Statistical methods

Age-sex-specific death rates for the diabetic population were calculated using person-years of follow-up accumulated by each age-sex group. Person-years for subjects lost to follow-up or who had moved overseas were calculated as the time to the last known date of contact. Mortality estimates were standardized using both indirect and direct methods (25,26). Age-sex-standardized mortality ratios (SMRs) were calculated to compare mortality in the study cohort to that of Canterbury's general population, with 95% CIs determined using methods outlined by Lilienfeld and Lilienfeld (26). To allow

international and future comparison, death rates age-standardized against the Segi standard world population (26,27) are also presented. Two forward stepwise Cox proportional hazards models (7,13,28–30), with *P* values for entry of covariates into the regression set at 0.05, were generated to investigate the combined effects of (attained) age, sex, age at onset of diabetes, duration of diabetes, and diabetes group on survival time. Stepwise regression objectively selects the variables according to their predictive power. The regression models were produced using StatView (31). Abridged actuarial life tables to derive life expectancies were constructed using the 10-year age-specific mortality rates (32,33). It was assumed that group B and C subjects experienced the same mortality rates as the general population up to age 30 years.

**RESULTS** — A total of 303 individuals died during the 9 years, with no difference in number by sex (51.5% male, 48.5% female). The mean age of those who died was  $65.3 \pm 14.3$  years, and mean duration of diabetes was  $16.5 \pm 11.2$  years at baseline, compared with  $41.6 \pm 18.5$  years ( $P < 0.001$ ) and  $13.0 \pm 10.1$  years ( $P < 0.001$ ), respectively, for survivors. Mean age at onset was also significantly different ( $48.6 \pm 18.3$  vs.  $28.5 \pm 17.5$  years,  $P < 0.001$ ). Age at death ranged from 18.2 to 96.7 years. Female subjects were older than male subjects (mean  $71.2 \pm 14.1$  vs.  $67.8 \pm 13.8$  years,  $P = 0.037$ ). Only four deaths (1.3%) occurred in individuals  $<30$  years of age, and most were in those aged  $\geq 60$  years (79.9%) (Table 2). Duration of diabetes at time of death ranged from 0.2 to 60.2 years (mean  $20.8 \pm 11.6$ ).

Table 3—Rates of mortality by diabetes classification

| Age-group (years) | Follow-up (person-years) | Observed number of deaths | Death rate (per 1,000 person-years) (95% CI) | SMR (95% CI)       |
|-------------------|--------------------------|---------------------------|----------------------------------------------|--------------------|
| Group A           |                          |                           |                                              |                    |
| 0–29              | 1,473.4                  | 4                         | 2.7 (0.7–6.9)                                | 2.67 (0.73–6.84)   |
| 30–39             | 911.1                    | 12                        | 13.2 (6.8–23.1)                              | 10.00 (5.17–17.50) |
| 40–49             | 604.7                    | 8                         | 13.2 (5.7–26.0)                              | 5.71 (2.46–11.25)  |
| 50–59             | 356.9                    | 11                        | 30.8 (15.4–55.1)                             | 4.58 (2.29–8.20)   |
| 60–69             | 141.5                    | 6                         | 42.4 (15.6–92.4)                             | 2.50 (0.68–6.40)   |
| 70–79             | 61.2                     | 3                         | 49.0 (10.1–143.1)                            | 1.03 (0.21–3.10)   |
| ≥80               | 1.9                      | 1                         | 526.3 (13.3–2,931.5)                         | 3.33 (0.08–18.50)  |
| Total             | 3,550.7                  | 45                        | 12.7 (9.3–17.0)                              | 3.72 (2.71–4.98)   |
| Group B           |                          |                           |                                              |                    |
| 0–29              | —                        | —                         | —                                            | —                  |
| 30–39             | 91.8                     | 0                         | 0.0                                          | —                  |
| 40–49             | 338.1                    | 2                         | 5.9 (0.7–21.3)                               | 2.86 (0.35–10.32)  |
| 50–59             | 545.4                    | 13                        | 23.8 (12.7–40.7)                             | 3.33 (1.77–5.69)   |
| 60–69             | 801.8                    | 37                        | 46.1 (32.5–63.6)                             | 2.70 (1.9–3.72)    |
| 70–79             | 641.3                    | 54                        | 84.2 (63.4–110.3)                            | 1.91 (1.44–2.50)   |
| ≥80               | 145.5                    | 34                        | 233.7 (162.0–327.0)                          | 1.87 (1.3–2.54)    |
| Total             | 2,563.9                  | 140                       | 54.6 (46.1–64.6)                             | 2.16 (1.82–2.56)   |
| Group C           |                          |                           |                                              |                    |
| 0–29              | 1.6                      | 0                         | 0.0                                          | —                  |
| 30–39             | 16.5                     | 0                         | 0.0                                          | —                  |
| 40–49             | 67.2                     | 1                         | 14.9 (0.4–83.0)                              | 5.00 (0.13–27.85)  |
| 50–59             | 229.0                    | 9                         | 39.3 (18.0–74.7)                             | 6.00 (2.75–11.40)  |
| 60–69             | 496.0                    | 33                        | 66.5 (45.8–93.8)                             | 4.13 (2.84–5.81)   |
| 70–79             | 335.7                    | 41                        | 122.1 (89.4–166.1)                           | 2.79 (2.00–3.78)   |
| ≥80               | 101.9                    | 30                        | 294.4 (198.7–421.0)                          | 2.34 (1.58–3.35)   |
| Total             | 1,247.9                  | 114                       | 91.4 (75.8–110.8)                            | 3.06 (2.53–3.69)   |

SMR was standardized against Canterbury's general population. †Group A includes subjects who were diagnosed at age <30 years and who commenced insulin therapy within 12 months of diagnosis. Group B comprises cases defined by age at onset of diabetes of ≥30 years and commencement of insulin treatment within 12 months of diagnosis. Group C subjects are those in whom insulin therapy commenced >12 months after diagnosis.

Female subjects provided 3,780 person-years of follow-up and male subjects 3,592 person-years, giving nonsignificantly different crude death rates of 38.9 deaths per 1,000 person-years (95% CI 33.0–45.9) for female subjects and 43.4 deaths per 1,000 person-years (37.0–51.0) for male subjects. The age-specific death rates increased significantly over the age structure of the population, reaching 265 deaths per 1,000 person-years in those aged ≥80 years. Applying these age-specific death rates to the Segi standard world population gives age-adjusted death rates of 16.2 per 1,000 for the diabetic cohort and 5.3 for Canterbury's general population.

With both age and sex standardization, mortality in the diabetic cohort was 2.64 (SMR, 95% CI 2.36–2.96) times higher than that for Canterbury's population in general (Table 2). Excess mortality applied for both male and female subjects

and was documented for diabetic subjects in all age-groups (SMR >2.00) except for those aged 0–29 years. Excess mortality peaked in the 30–39 years age-group, with an SMR of 9.23 (4.77–16.15).

Within the three clinical subgroups, 45 (10.4%) group A, 140 (37.6%) group B, and 114 (57.0%) group C patients had died by the end of follow-up ( $P < 0.001$ ). Four deaths, all of female subjects, could not be attributed to a clinical group. These subjects were excluded from subsequent analyses. Age-specific death rates and SMRs for the three groups are given in Table 3. There were no sex differences in the age-specific death rates. The crude death rates were heavily influenced by the different age structures of the three groups. Standardization against the Segi standard world population gives age-adjusted rates of 17.2, 11.5, and 28.6 deaths per 1,000 person-years for groups A, B, and C, respectively (assigning Canter-

bury's death rate of 0.98 per 1,000 to the 0–29 years age-group for groups B and C).

Standardized for age and sex against the Canterbury population, group A subjects had an SMR of 3.72 (2.71–4.98), which was higher than that of the two other groups (Table 3). SMR was lowest in group B, although mortality was still double that of the general population (2.16 [1.82–2.46]). As indicated in Table 3, the high excess mortality noted for the 30–49 years age-group is largely attributable to group A subjects, whereas increased risk in older subjects is more reflective of the high relative mortality of group C subjects.

Results for duration of diabetes (not presented in detail here) are inconclusive, but suggest that there may be a difference in standardized mortality (relative to Canterbury's general population) between subjects with diabetes duration <20 years and ≥20 years, with SMRs of 2.44 (2.08–2.86) and 2.93 (2.48–3.47), respectively. Those most at risk of high relative mortality were subjects with duration of diabetes ≥20 years aged 30–39 years (SMR 18.60 [8.02–36.64]) and 40–49 years (SMR 7.14 [2.86–14.71]). However, these SMRs are based on small numbers of observed deaths and statistically are difficult to distinguish from those recorded for age-matched subjects with duration of diabetes <20 years (SMR 4.44 [1.21–11.37] and 3.13 [0.85–8.01], respectively).

Two stepwise proportional hazard models (Table 4) show the independent effects of age, sex, age at diagnosis, duration of diabetes, and diabetes group on time to death. Based on probability values, age was found to be the dominant predictor of risk (hazard ratio = 1.08 per 1-year increase in age) when all five variables were free to enter the model (model 1). Given this and the presence of collinearity, age was excluded from model 2 in an attempt to isolate the effects of age at onset and duration of diabetes on relative hazard (correlation coefficients between these three variables were significant at  $P < 0.001$ ).

Sex was a significant factor in both models, with a 44% increase in hazard over the study period for male versus female subjects. Diabetes group (with group B, which has the lowest SMR, as the reference population) also exerts a significant independent effect on risk of death. There was a 46% increase in hazard for group C versus group B subjects after controlling for the other covariates. Both age at onset and duration of diabetes were significant factors

Table 4—Cox proportional hazards models of time to death

| Covariate    | Estimate of regression coefficient ( $\beta$ ) | P       | exp( $\beta$ ) | 95% CI    |
|--------------|------------------------------------------------|---------|----------------|-----------|
| Model 1      |                                                |         |                |           |
| Age          | 0.07                                           | <0.0001 | 1.08           | 1.07–1.09 |
| Sex (male)   | 0.37                                           | 0.0016  | 1.44           | 1.15–1.81 |
| Group        |                                                | 0.0078  |                |           |
| A            | 0.29                                           | 0.1474  | 1.34           | 0.90–1.97 |
| C            | 0.38                                           | 0.0024  | 1.47           | 1.15–1.88 |
| Model 2      |                                                |         |                |           |
| Sex (male)   | 0.37                                           | 0.0016  | 1.45           | 1.15–1.82 |
| Age at onset | 0.07                                           | <0.0001 | 1.08           | 1.06–1.09 |
| Duration     | 0.08                                           | <0.0001 | 1.08           | 1.06–1.09 |
| Group        |                                                | 0.0109  |                |           |
| A            | 0.24                                           | 0.3120  | 1.27           | 0.80–2.03 |
| C            | 0.38                                           | 0.0028  | 1.46           | 1.14–1.87 |

Exp( $\beta$ ) is the increase in relative hazard by a 1-year increase in age, age at onset, and duration of diabetes, or the change in hazard for male subjects relative to female subjects and group A and C relative to group B. For model 1, age at onset and duration of diabetes were not significant at  $P = 0.05$  and therefore are not included in the regression. For model 2, age was excluded from the model.

when age is excluded (model 2). The regression coefficient for duration of diabetes of 0.08 indicates that a patient who had diabetes for 20 years had a 4.48-fold increase in risk of dying over the 9-year follow-up period relative to a newly diagnosed individual of the same sex, age at diagnosis, and type of diabetes. However, given the similarity in the regression coefficients in models 1 and 2, this may not be due to the impact of duration of diabetes but rather age, i.e., the subject being 20 years older.

Life expectancy was reduced for both sexes and for all age-groups in the diabetic cohort compared with Canterbury's general population. Life expectancy at birth was 79.5 years for Canterbury women and 72.6 years for men, but 61.8 years for diabetic women and 57.5 years for diabetic men. As for the general population, life expectancy for female diabetic patients was higher in all age-groups than for male diabetic patients. The differential in life expectancy between the diabetic and the general population diminished with age (Fig. 1). Nevertheless, at 70 years of age, the average remaining years of life for diabetic female and male subjects were 9.1 and 7.1 years, compared with 15.1 and 11.8 years for Canterbury's general population. In terms of the probability of surviving to this age, only one of three diabetic individuals would be expected to be alive at 70 years of age, compared with three of every four individuals in the general population.

Group A subjects had the lowest life expectancy at birth (59.7 years): 1.9 years

below that for group C, 7.1 years below group B, and 16.5 years below that of the general population (Fig. 1). After 50 years of age, there was no difference in life expectancy between group A and B subjects. Some 17% of group A subjects would not be expected to survive to age 40 years. Reduction in life expectancy between ages 40 and 69 years was most marked for group C patients. While group C subjects

have a 97% chance of surviving to 40 years of age, 41% of these patients would not be expected to survive to 70 years of age.

**CONCLUSIONS** — The Canterbury Diabetes Registry cohort includes all individuals using insulin in the community. Therefore, mortality across the full spectrum of type 1 diabetic individuals could be studied. The two main methodological problems in measuring diabetes-related mortality are the representativeness of the study population and appropriateness of statistical methods (2,7). This study overcomes these problems, the longitudinal population perspective used, and the avoidance of death certificates as the source of enumeration giving confidence that the findings accurately describe the mortality experience of this diabetic population.

The results confirm that diabetes is associated with high levels of mortality and shortened life spans. All-cause mortality in Canterbury's insulin-treated diabetic population was two and a half times higher than that in the general population, standardizing for age and sex. This level of relative mortality is consistent with that recorded in Tasmania (SMR 2.2 [2.0–2.4]), the Tasmanian Diabetes Registry cohort (9,34) being similar in demographic and clinical characteristics to the current study population. In Canterbury, relative mortality

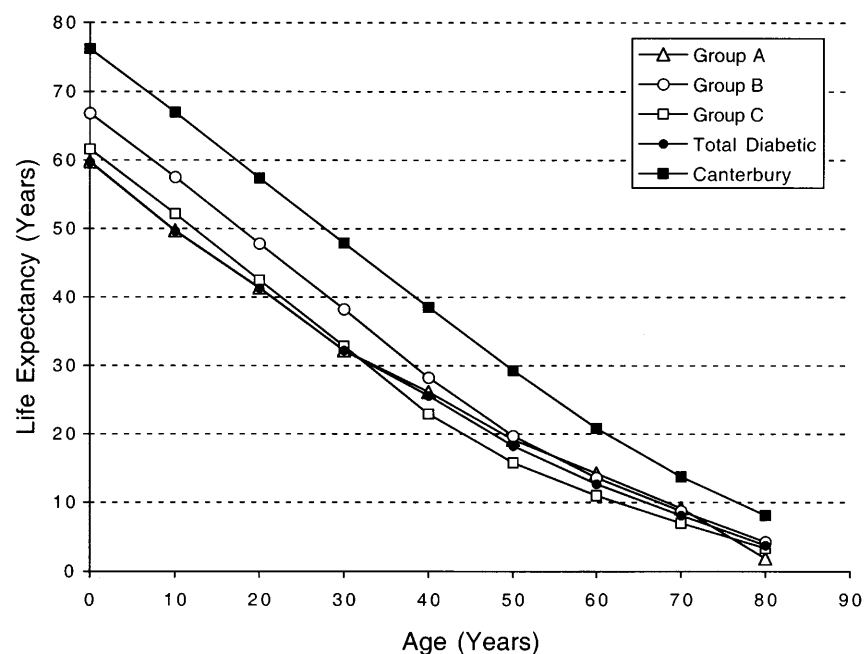

Figure 1—Age-specific life expectancies for Canterbury's insulin-treated diabetic cohort and by clinical subtype versus Canterbury's general population.

peaked in the 30–39 years age-group. High excess mortality has also been noted in Scandinavia for this age-group (1,2,7). This is postulated to reflect the cumulative impact of renal disease in juvenile-onset patients with long duration of diabetes.

The majority of studies indicate that there are no sex differences in mortality associated with type 1 diabetes (1–3,10,35,36). In the Canterbury cohort, the two Cox proportional hazard regression models, which describe the cumulative experience of the cohort over the study period, showed sex to be a significant predictor of death after controlling for age effects. Green and Hougaard (7) also used proportional hazard modeling to determine the effects of sex and age at onset of diabetes on mortality in type 1 diabetic individuals. Both studies show a 40% increase in hazard for male relative to female subjects over the respective follow-up periods. Female patients outlived male patients at all ages. Sex differentials in diabetes mortality thus appear to parallel those within the general population.

Few studies have measured the impact of diabetes on life expectancy. In type 1 diabetes, the generally held view is that of Panzram (6), who reported shortened life spans up to 70 years of age, after which there was little or no difference from those without diabetes. In contrast, this study shows marked reductions in life expectancy even in the very old. While it can be concluded that the calculated life expectancies of 62 years for female and 58 years for male subjects indicate a significant disease burden, these figures need to be interpreted within the context of their derivation. They assume that the mortality rates observed in the study cohort over the follow-up period would apply to an individual born today. However, >40% of the cohort were diagnosed before 1970. Calendar time periods, used as surrogates for different treatment eras, have been shown to be a predictor of survival (1–3). Although unable to differentiate between types of diabetes, Scragg (15) reported that diabetes-related death rates, based on death certificate data, declined in New Zealand over the period 1966–1985. Most of this decline occurred, however, in older age-groups, with no change in the 25–54 years age bracket. While life expectancies are likely to be higher in the future, the magnitude of the differences between the diabetic and general populations suggest that outcomes for diabetic individuals will remain poor, especially in young and middle-aged groups.

This study shows that there are significant differences in the mortality of the three identifiable clinical subgroups of insulin users. The results confirm that relative mortality is highest in child and young adult-onset patients, with nearly a fourfold increase in mortality compared with the background population. This is similar to the finding from Tasmania. A lower SMR of 2.38 was reported in Leicestershire (3), but the oldest age at which a patient died in this study was only 51 years (3). In the Canterbury cohort, half of the deaths occurred at >50 years of age. Joner and Patrick (37) also report a lower SMR of 2.07 for Norway, but the attained age of all subjects was <30 years of age. This level of relative mortality is consistent with that found for the 0–29 years age-group. Similarly, Nystrom et al. (38) reported a SMR of 2.1 for young-onset (15–34 years) type 1 patients living in Sweden, although the duration of follow-up was short and there were only 18 recorded deaths in the study. It should be noted that while SMRs permit comparison of the direction of the ratios and basic consistency of findings, they do not give the underlying levels of mortality within these different populations. Without using a common standard population to control for varying age structures, the death rates cannot be compared directly (27).

Results in the literature are conflicting as to whether age at diagnosis is a significant predictor of mortality for type 1 diabetes. Some studies report no relationship between age at onset and chances of survival, especially when controlling for duration of diabetes (3,37), whereas others found relative mortality decreased with increasing age at onset and increased with duration of diabetes up to ~20 years' duration, after which it declined (1,2,7). However, the problem of colinearity between attained age, age at diagnosis, and duration of diabetes in proportional hazard regression modeling makes interpretation of results difficult (1,17). In Canterbury, attained age, sex, and diabetes group were the key predictors of diabetes mortality. Age at onset of diabetes became a significant factor only when age was excluded from the regression. However, the resultant coefficient is contrary to other findings, indicating increasing mortality with increasing age at onset while controlling for duration of diabetes and diabetes type. This most likely reflects a substitution rather than a real effect in the modeling, with age at diagnosis and duration of diabetes mirroring the risk associated with increasing age.

There are marked differences in the survival of the three diabetes groups, group B individuals having lower relative mortality rates and longer life expectancies. Young-onset patients must survive relatively high death rates in early to middle adult life to achieve life expectancies similar to subjects diagnosed in adulthood or in the general population. Group C individuals, indicative of those who have slowly progressed to insulin deficiency or who had insulin-treated type 2 diabetes, had three times the risk of death than age-sex-matched individuals in the general population. These results support Swedish and Tasmanian research showing significant excess mortality in this group of patients (9,38). The high rates of mortality in the >40 years age-group is largely attributable to group C subjects.

A major limitation of this study is the lack of immunologic, genetic, and clinical data for subjects, which would have allowed a more definitive classification of diabetes and subsequent analysis by diabetes type. The results for groups B and C may be affected by misclassification and heterogeneity. However, the degree of difference in mortality and life expectancy between the three groups, combined with the consistency of findings particularly with the Tasmanian study (9), suggest that very real differences do exist between clinical groups of insulin-treated subjects.

The merits of delaying the onset of type 1 diabetes in susceptible children have been debated widely in the literature. The findings of this research indicate that emphasis should also be given to the clinical application of autoimmune markers for the detection of latent type 1 diabetes. This may prevent incorrect diagnosis of type 2 diabetes and enable early treatment with insulin rather than oral agents (23,39–41). The effects of future treatment approaches of immune modulation and early commencement of insulin therapy on change in complication status and survival times need to be measured in both children and adults with type 1 diabetes. For those subjects with impending  $\beta$ -cell failure, earlier initiation of insulin therapy, lipid modification, and blood pressure control are possible approaches that could easily be implemented now as plausible strategies to improve the documented poor survival outcomes (42). Researching the causes of death will assist in the identification of appropriate early interventional treatment strategies.

This study provides a baseline from which trends in mortality can be established and improvements in health outcomes gauged. Research into cause-specific mortality is currently being undertaken. However, further investigation and refinement of the classification of diabetes is needed to confirm and clarify those mortality differentials between clinical subgroups indicated by this research.

**Acknowledgments** — The New Zealand Health Research Council funded this research.

The study was approved by the Ethics Committee of the local health authority.

## References

- Green A, Borch-Johnsen K, Kragh Andersen P, Hougaard P, Keiding N, Kreiner N, Deckert T: Relative mortality of type 1 (insulin-dependent) diabetes in Denmark: 1933–1981. *Diabetologia* 28:339–342, 1985
- Borch-Johnsen K, Kreiner S, Deckert T: Mortality of type 1 (insulin dependent) diabetes mellitus in Denmark: a study of relative mortality in 2930 Danish type 1 diabetic patients diagnosed from 1933 to 1972. *Diabetologia* 29:767–772, 1986
- McNally PG, Raymond NT, Burden ML, Burton PR, Botha JL, Swift PG, Burden AC, Hearnshaw JR: Trends in mortality of childhood-onset insulin dependent diabetes mellitus in Leicestershire: 1940–1991. *Diabet Med* 12:961–966, 1995
- Gatling W, Tufail S, Mullee MA, Westacott TA, Hill RD: Mortality rates in diabetic patients from a community-based population compared to local age/sex matched controls. *Diabet Med* 14:316–320, 1997
- Marks HH: Longevity and mortality of diabetics. *Am J Public Health* 55:416–423, 1965
- Panzram G: Epidemiological data on excess mortality and life expectancy in insulin-dependent diabetes mellitus: critical review. *Exp Clin Endocrinol* 83:93–100, 1984
- Green A, Hougaard P: Epidemiological studies of diabetes mellitus in Denmark. 5. Mortality and causes of death among insulin-treated diabetic patients. *Diabetologia* 26:190–194, 1984
- Diabetes Epidemiology Research International Mortality Study Group: International analysis of insulin-dependent diabetes mellitus mortality: a preventable mortality perspective. *Am J Epidemiol* 142:612–618, 1995
- Riley MD, McCarthy DJ, Couper DJ, Humphrey ARG, Dwyer T, Zimmet PZ: The 1984 Tasmanian insulin treated diabetes mellitus prevalence cohort: an eight and a half year mortality follow-up investigation. *Diabetes Res Clin Pract* 29:27–35, 1995
- Deckert T, Poulsen JE, Larsen M: Prognosis of diabetics with diabetes onset before the age of thirty-one. I. Survival, causes of death, and complications. *Diabetologia* 14: 363–370, 1978
- Brown LJ, Scott RS: A population based diabetes register: development and applications. *Community Health Studies* 12:437–441, 1988
- Scott RS, Brown LJ: Diabetes in Canterbury (NZ): prevalence and incidence of insulin-treated diabetes mellitus in adults in Canterbury, New Zealand. *Diabet Med* 8:443–447, 1991
- Knuiman MW, Welborn TA, Whittall DE: An analysis of excess mortality rates for persons with non-insulin dependent diabetes mellitus in Western Australia using the Cox proportional hazards regression model. *Am J Epidemiol* 135:638–648, 1992
- Simons LA, McCallum J, Friedlander Y, Simons J: Diabetes mortality and coronary heart disease in the prospective Dubbo study of Australian elderly. *Aust N Z J Med* 26:66–74, 1996
- Scragg R: *Diabetes Mellitus: Secular Trends in Mortality in New Zealand, 1966–1985*. National Health Statistics Centre, New Zealand Department of Health, Wellington, New Zealand, 1989
- Whittall DE, Glatthaar C, Knuiman MW, Welborn TA: Deaths from diabetes are under-reported in national mortality statistics. *Med J Aust* 152:598–600, 1990
- Kostraba JN, Dorman JS, LaPorte RE, Kuller LH, Orchard TJ, Becker DJ, Drash AL: The investigation of age at onset as a risk factor for the mortality in persons with insulin dependent diabetes mellitus using Cox proportional hazards models. *Am J Epidemiol* 133:67–71, 1991
- Zimmet P, Alberti G, de Courten MP: New classification and criteria for diabetes: moving the goal posts closer. *Med J Aust* 168: 593–594, 1998
- Alberti KG, Zimmet PZ, for the WHO Consultation: Definition, diagnosis and classification of diabetes mellitus and its complications. I. Diagnosis and classification of diabetes mellitus: provisional report of a WHO consultation. *Diabet Med* 15: 539–553, 1998
- Seissler J, de Sonnaville JJ, Morgenthaler NG, Steinbrenner H, Glawe D, Khoo-Morgenthaler UY, Lan MS, Notkins AL, Heine RJ, Scherbaum WA: Immunological heterogeneity in type 1 diabetes: presence of distinct autoantibody patterns in patients with acute onset and slowly progressive disease. *Diabetologia* 41:891–897, 1998
- Yamada H, Uchigata Y, Kawasaki E, Matsuura N, Otani T, Sato A, Mutoh K, Kasahara T, Fukushima N, Koike A, Mizota M, Miura J, Kubo H, Yamaguchi A, Nagataki S, Omori Y, Iwamoto Y: Onset age dependent variations in three islet autoantibodies in Japanese IDDM patients. *Diabetes Res Clin Pract* 39:211–217, 1998
- Inukai T, Fujiwara Y, Tayama K, Aso Y, Ogino K, Takemura Y: Clinical characteristics of patients with the initial diagnosis of NIDDM with positivity for antibodies to glutamic acid decarboxylase. *Exp Clin Endocrinol Diabetes* 105:327–330, 1997
- Turner R, Stratton I, Horton V, Manley S, Zimmet P, Mackay IR, Shattock M, Bottazzo GF, Holman R: UKPDS 25: autoantibodies to islet cell cytoplasm and glutamic acid decarboxylase for prediction of insulin requirement in type 2 diabetes. *Lancet* 350: 1288–1293, 1997
- Elliott RB, Pilcher CC: Childhood diabetes in the Auckland area. *N Z Med J* 87:922–923, 1985
- Bland M: *An Introduction to Medical Statistics*. Oxford, U.K., Oxford University Press, 1987
- Lilienfeld AM, Lilienfeld DE: *Foundations of Epidemiology*. New York, Oxford University Press, 1980
- Carson CA, Taylor HR, McCarty DJ, Zimmet P: Age-standardization in epidemiological data. *Int J Epidemiol* 23:643–644, 1994
- Cox DR, Oates D: *Analysis of Survival Data*. London, Chapman and Hall, 1984
- Andersen PK, Borch-Johnsen K, Deckert T, Green A, Hougaard P, Keiding N, Kreiner S: A Cox regression model for relative mortality and its application to diabetes mellitus survival data. *Biometrics* 41:921–932, 1985
- Kahn HA, Sempos CT: *Statistical Methods in Epidemiology*. New York, Oxford University Press, 1989
- Abacus-Concepts: *StatView Reference*. Berkeley, CA, Abacus Concepts, 1996
- Keyfitz N, Flieger W: *Population: Facts and Methods of Demography*. San Francisco, CA, W.H. Freeman, 1971
- Courtney D: *Statistical Demography*. New York, St. Martin's Press, 1978
- King H, Senator G, Zimmet P, Harris A: The Tasmanian insulin-treated diabetes register: inception and progress in the first 12 months. *Med J Aust* 144:414–416, 1986
- Dorman JS, LaPorte RE, Kuller LH, Cruikshanks KJ, Orchard TJ, Wagener DK, Becker DJ, Cavender DE, Drash AL: The Pittsburgh Insulin-Dependent Diabetes Mellitus (IDDM) Morbidity and Mortality Study mortality results. *Diabetes* 33:271–276, 1984
- Diabetes Epidemiology Research International Mortality Study Group: Sex differences in the mortality associated with insulin-dependent diabetes mellitus in four countries. *Am J Epidemiol* 133:577–584, 1991
- Joner G, Patrick S: The mortality of children with type 1 (insulin-dependent) diabetes mellitus in Norway, 1973–1988. *Diabetologia* 34:29–32, 1991
- Nystrom L, Ostman J, Wall S, Wibell L: Mortality of all incident cases of diabetes mellitus in Sweden diagnosed 1983–1987

- at age 15–34 years: Diabetes Incidence Study in Sweden (DISS) Group. *Diabet Med* 9:422–427, 1992
39. Breidert M, Temelkova-Kurktschiev T, Hanefeld M, Leonhardt W, Schmoeckel A, Seissler J: Prevalence of diabetes specific autoantibodies in patients at risk for adult onset diabetes mellitus. *Exp Clin Endocrinol Diabetes* 106:113–116, 1998
  40. Fukui M, Nakamura N, Nakano K, Sawada M, Aoji O, Obayashi H, Shigeta H, Kondo M: Antibodies to GAD in elderly patients with previously diagnosed NIDDM (Letter). *Diabetes Care* 21:675–676, 1998
  41. Zimmet P: Antibodies to glutamic acid decarboxylase in the prediction of insulin dependency. *Diabetes Res Clin Pract* 34: S125–S131, 1996
  42. Webster MWI, Scott RS: What cardiologists need to know about diabetes. *Lancet* 350 (Suppl. 1):23–28, 1997
